# Supplementary material
Source: Springer Nature journal article supplement (https://www.springermedizin.de/resource/supplementary/12970_2012_312_MOESM3_ESM.pdf/9594822)

# Carbonyl Proteins (CP)

Before and after 14 weeks treatment  
pre and post exercise

n = 23

P<sub>Ex</sub> = 0.006

P<sub>Tx</sub> = 0.061

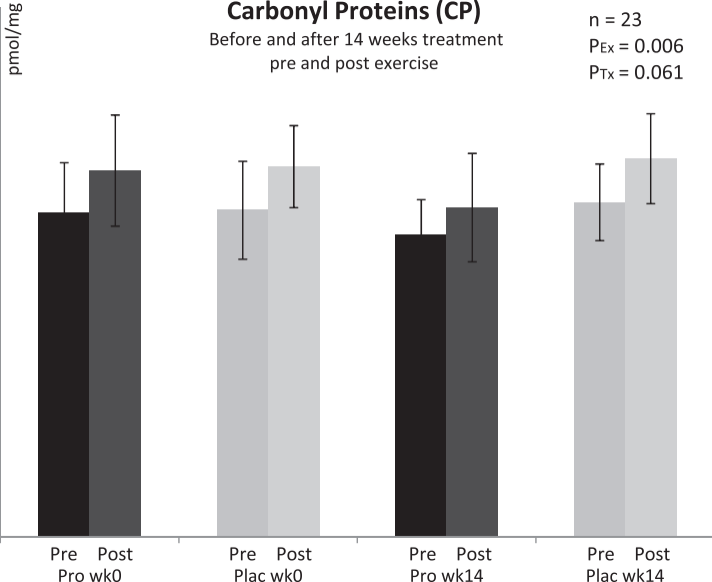

Supplement: MOESM3 [file 9594822]
